# Supplementary material for: An 8-gene signature predicts the prognosis of cervical cancer following radiotherapy
Source: PubMed Central journal article supplement — Mol Med Rep. 2019 Jul 29;20(4):2990–3002. doi: 10.3892/mmr.2019.10535 (PMC6755236; doi:10.3892/mmr.2019.10535), 2019-07-29
Supplement: Supplementary_Data.pdf [file Supplementary_Data.pdf]

Table SI. List of the 107 differentially expressed genes in the radiotherapy group. A negative correlation was identified between the expression and methylation levels.

| Gene     | Correlation coefficient |
|----------|-------------------------|
| ABCG2    | -0.06874                |
| ABHD1    | -0.04623                |
| ABO      | -0.10276                |
| ACTC1    | -0.10224                |
| ADCY2    | -0.03229                |
| AK5      | -0.01875                |
| ALOX12B  | -0.03239                |
| ALOX15B  | -0.07402                |
| AMDHD1   | -0.06425                |
| ANKS1B   | -0.01901                |
| ARC      | -0.05317                |
| ATP1A3   | -0.10381                |
| BMP3     | -0.01507                |
| CCDC136  | -0.07873                |
| CCNA1    | -0.03357                |
| CD1B     | -0.02852                |
| CEND1    | -0.07645                |
| CHST13   | -0.01306                |
| CHST8    | -0.10764                |
| CKM      | -0.10068                |
| CPLX3    | -0.07739                |
| CRCT1    | -0.0841                 |
| CRHR1    | -0.0201                 |
| CRIP3    | -0.0074                 |
| CRYBA2   | -0.0531                 |
| CSRNP3   | -0.0055                 |
| CST6     | -0.0961                 |
| CXCL5    | -0.01025                |
| CYP26A1  | -0.00016                |
| CYP4F22  | -0.08921                |
| DACH1    | -0.0521                 |
| DACT2    | -0.08399                |
| DPF1     | -0.12821                |
| EFCAB6   | -0.05882                |
| ELOVL3   | -0.10721                |
| FBXO17   | -0.05107                |
| FCRLA    | -0.152                  |
| FIBCD1   | -0.08332                |
| FNDC5    | -0.11829                |
| FOXC2    | -0.02672                |
| GALR2    | -0.0282                 |
| GOLT1A   | -0.0477                 |
| GPRIN2   | -0.01319                |
| GSTM1    | -0.05934                |
| HHIP     | -0.04089                |
| HIST1H3C | -0.05535                |
| HIST1H4D | -0.00138                |
| HOXC5    | -0.09848                |
| HRK      | -0.07883                |
| ICAM5    | -0.00654                |
| IHH      | -0.07796                |
| IRX6     | -0.06953                |
| ITGA8    | -0.07493                |
| KCNN1    | -0.07224                |
| KISS1R   | -0.10574                |
| KLK1     | -0.09214                |
| KLK7     | -0.03982                |

Table SI. Continued.

| Gene     | Correlation coefficient |
|----------|-------------------------|
| KLK8     | -0.05431                |
| KLRG2    | -0.03788                |
| LRAT     | -0.06393                |
| LRFN1    | -0.00695                |
| LRRC26   | -0.05424                |
| LRRN2    | -0.05664                |
| MEGF11   | -0.03113                |
| MOV10L1  | -0.02692                |
| NBEA     | -0.03503                |
| NBPF3    | -0.09269                |
| NDST3    | -0.03182                |
| NEB      | -0.04598                |
| NGF      | -0.05945                |
| NKAIN1   | -0.04599                |
| NOG      | -0.01084                |
| NPTX1    | -0.03998                |
| NRG2     | -0.02687                |
| PACRG    | -0.01971                |
| PAIP2B   | -0.13272                |
| PGR      | -0.08043                |
| PKHD1L1  | -0.00917                |
| POMC     | -0.02613                |
| PRDM6    | -0.02908                |
| PRIMA1   | -0.02938                |
| PRRT4    | -0.04037                |
| PRSS35   | -0.00879                |
| RASL10B  | -0.12583                |
| RGL3     | -0.04283                |
| RNF182   | -0.10085                |
| RTBDN    | -0.06192                |
| SEMA3E   | -0.00825                |
| SIGLEC15 | -0.11174                |
| SIX3     | -0.00359                |
| SLC17A7  | -0.0182                 |
| SLC35F1  | -0.11334                |
| SPOCK3   | -0.03299                |
| SPSB4    | -0.03942                |
| SPTBN4   | -0.00272                |
| SYT13    | -0.07686                |
| TCL1A    | -0.03416                |
| TMEM233  | -0.00611                |
| TMEM59L  | -0.0254                 |
| TMEM63C  | -0.00699                |
| TNNI3    | -0.06494                |
| USP44    | -0.01502                |
| WIF1     | -0.14805                |
| ZBTB8B   | -0.03209                |
| ZFPM2    | -0.07772                |
| ZFYVE28  | -0.03899                |
| ZNF502   | -0.09462                |

Table SII. DEGs and DMGs associated with cervical cancer prognosis in the radiotherapy group. A negative correlation was identified between the expression and methylation levels.

| DEGs (n=25) |                       | DMGs (n=21) |                       |
|-------------|-----------------------|-------------|-----------------------|
| Gene        | P-value               | Gene        | P-value               |
| TMEM233     | 1.30x10 <sup>-4</sup> | SYT13       | 1.80x10 <sup>-3</sup> |
| TCL1A       | 4.10x10 <sup>-4</sup> | TMEM233     | 2.45x10 <sup>-3</sup> |
| FOXC2       | 1.00x10 <sup>-3</sup> | SEMA3E      | 3.85x10 <sup>-3</sup> |
| CXCL5       | 1.25x10 <sup>-3</sup> | WIF1        | 5.00x10 <sup>-3</sup> |
| ABHD1       | 1.85x10 <sup>-3</sup> | FOXC2       | 5.50x10 <sup>-3</sup> |
| ALOX12B     | 3.00x10 <sup>-3</sup> | CRCT1       | 6.50x10 <sup>-3</sup> |
| CYP26A1     | 3.00x10 <sup>-3</sup> | NPTX1       | 8.00x10 <sup>-3</sup> |
| RASL10B     | 5.50x10 <sup>-3</sup> | CCDC136     | 9.50x10 <sup>-3</sup> |
| CSRNP3      | 5.50x10 <sup>-3</sup> | TNNI3       | 1.05x10 <sup>-2</sup> |
| EFCAB6      | 7.00x10 <sup>-3</sup> | FIBCD1      | 1.25x10 <sup>-2</sup> |
| HIST1H4D    | 9.50x10 <sup>-3</sup> | CXCL5       | 1.75x10 <sup>-2</sup> |
| RTBDN       | 1.15x10 <sup>-2</sup> | HHIP        | 1.90x10 <sup>-2</sup> |
| CD1B        | 1.15x10 <sup>-2</sup> | ZFPM2       | 2.30x10 <sup>-2</sup> |
| CCDC136     | 1.35x10 <sup>-2</sup> | ANKS1B      | 2.45x10 <sup>-2</sup> |
| SYT13       | 2.60x10 <sup>-2</sup> | CCNA1       | 2.85x10 <sup>-2</sup> |
| ZNF502      | 3.60x10 <sup>-2</sup> | ACTC1       | 3.05x10 <sup>-2</sup> |
| CHST8       | 3.65x10 <sup>-2</sup> | LRRC26      | 3.55x10 <sup>-2</sup> |
| ABCG2       | 3.80x10 <sup>-2</sup> | ABCG2       | 3.85x10 <sup>-2</sup> |
| TNNI3       | 3.80x10 <sup>-2</sup> | CYP4F22     | 4.25x10 <sup>-2</sup> |
| MOV10L1     | 3.80x10 <sup>-2</sup> | CYP26A1     | 4.45x10 <sup>-2</sup> |
| TMEM63C     | 4.20x10 <sup>-2</sup> | ELOVL3      | 4.60x10 <sup>-2</sup> |
| NGF         | 4.35x10 <sup>-2</sup> | -           | -                     |
| SIX3        | 4.45x10 <sup>-2</sup> | -           | -                     |
| KLRG2       | 4.65x10 <sup>-2</sup> | -           | -                     |
| FBXO17      | 4.75x10 <sup>-2</sup> | -           | -                     |

-DEGs, differentially expressed genes; DMGs, differentially methylated genes.

Table SIII. Differentially expressed genes between patients with high- and low-risk status based on the 8-gene signature.

| Gene      | P-value               | FDR                   | logFC    |
|-----------|-----------------------|-----------------------|----------|
| AADACL2   | 7.75x10 <sup>-3</sup> | 4.49x10 <sup>-2</sup> | -0.89732 |
| ABCA13    | 7.24x10 <sup>-3</sup> | 4.28x10 <sup>-2</sup> | -0.33757 |
| ABCC9     | 1.40x10 <sup>-4</sup> | 3.08x10 <sup>-3</sup> | 0.337939 |
| ACAN      | 1.59x10 <sup>-5</sup> | 7.64x10 <sup>-4</sup> | 0.351872 |
| ADAM12    | 4.68x10 <sup>-8</sup> | 2.15x10 <sup>-5</sup> | 0.29804  |
| ADAMTS12  | 4.52x10 <sup>-8</sup> | 2.15x10 <sup>-5</sup> | 0.598873 |
| ADAMTS15  | 5.94x10 <sup>-4</sup> | 8.11x10 <sup>-3</sup> | 0.506878 |
| ADAMTS16  | 8.87x10 <sup>-4</sup> | 1.07x10 <sup>-2</sup> | 0.52636  |
| ADAMTS2   | 3.82x10 <sup>-6</sup> | 3.18x10 <sup>-4</sup> | 0.305284 |
| ADAMTS3   | 1.86x10 <sup>-3</sup> | 1.72x10 <sup>-2</sup> | 0.378401 |
| ADAMTS5   | 3.10x10 <sup>-6</sup> | 2.71x10 <sup>-4</sup> | 0.343539 |
| ADAMTS6   | 3.51x10 <sup>-5</sup> | 1.25x10 <sup>-3</sup> | 0.317886 |
| ADAMTS7   | 6.87x10 <sup>-9</sup> | 1.01x10 <sup>-5</sup> | 0.317415 |
| ADCY1     | 4.46x10 <sup>-6</sup> | 3.53x10 <sup>-4</sup> | 0.349395 |
| ADH7      | 6.12x10 <sup>-4</sup> | 8.28x10 <sup>-3</sup> | -0.59035 |
| ADRA2B    | 5.77x10 <sup>-3</sup> | 3.67x10 <sup>-2</sup> | -0.28497 |
| AGT       | 6.42x10 <sup>-3</sup> | 3.94x10 <sup>-2</sup> | 0.357521 |
| AGTR1     | 3.07x10 <sup>-3</sup> | 2.42x10 <sup>-2</sup> | 0.549842 |
| AIPL1     | 4.45x10 <sup>-3</sup> | 3.09x10 <sup>-2</sup> | -0.66126 |
| AKAP2     | 1.72x10 <sup>-7</sup> | 4.36x10 <sup>-5</sup> | 0.392922 |
| ALDH3A1   | 1.19x10 <sup>-6</sup> | 1.51x10 <sup>-4</sup> | -0.33006 |
| ALOX15    | 3.11x10 <sup>-3</sup> | 2.44x10 <sup>-2</sup> | -0.48373 |
| ALOXE3    | 5.77x10 <sup>-3</sup> | 3.67x10 <sup>-2</sup> | -0.32425 |
| ALPK2     | 9.27x10 <sup>-4</sup> | 1.10x10 <sup>-2</sup> | 0.336245 |
| AMH       | 8.00x10 <sup>-3</sup> | 4.58x10 <sup>-2</sup> | -0.297   |
| AMPH      | 4.07x10 <sup>-3</sup> | 2.89x10 <sup>-2</sup> | 0.32207  |
| ANKRD20A3 | 2.74x10 <sup>-3</sup> | 2.23x10 <sup>-2</sup> | -0.29925 |
| ANKRD24   | 6.94x10 <sup>-6</sup> | 4.52x10 <sup>-4</sup> | -0.30025 |
| APCDD1L   | 6.15x10 <sup>-4</sup> | 8.30x10 <sup>-3</sup> | 0.536191 |
| APOBEC3H  | 1.24x10 <sup>-3</sup> | 1.34x10 <sup>-2</sup> | -0.26673 |
| AQP9      | 1.44x10 <sup>-3</sup> | 1.46x10 <sup>-2</sup> | 0.284524 |
| AR        | 7.10x10 <sup>-3</sup> | 4.21x10 <sup>-2</sup> | 0.48275  |
| ARHGAP42  | 9.90x10 <sup>-5</sup> | 2.42x10 <sup>-3</sup> | 0.280025 |
| ARHGEF33  | 5.98x10 <sup>-7</sup> | 1.02x10 <sup>-4</sup> | -0.29464 |
| ARL9      | 5.17x10 <sup>-3</sup> | 3.40x10 <sup>-2</sup> | -0.38111 |
| ARRDC5    | 1.72x10 <sup>-3</sup> | 1.63x10 <sup>-2</sup> | -0.35198 |
| ASAH2B    | 5.96x10 <sup>-3</sup> | 3.76x10 <sup>-2</sup> | 0.376727 |
| AVPR1A    | 2.19x10 <sup>-4</sup> | 4.19x10 <sup>-3</sup> | 0.512689 |
| B3GAT2    | 2.22x10 <sup>-3</sup> | 1.94x10 <sup>-2</sup> | 0.269707 |
| BCL2L14   | 2.87x10 <sup>-3</sup> | 2.31x10 <sup>-2</sup> | -0.27735 |
| BEST3     | 3.33x10 <sup>-3</sup> | 2.56x10 <sup>-2</sup> | 0.805954 |
| BHLHA15   | 1.00x10 <sup>-4</sup> | 2.44x10 <sup>-3</sup> | 0.562517 |
| BICC1     | 6.44x10 <sup>-8</sup> | 2.79x10 <sup>-5</sup> | 0.629694 |
| BMP7      | 7.85x10 <sup>-5</sup> | 2.06x10 <sup>-3</sup> | -0.30184 |
| BTBD19    | 8.47x10 <sup>-4</sup> | 1.04x10 <sup>-2</sup> | 0.327733 |
| C11orf86  | 5.18x10 <sup>-4</sup> | 7.39x10 <sup>-3</sup> | 1.196457 |
| C14orf39  | 3.92x10 <sup>-3</sup> | 2.82x10 <sup>-2</sup> | -0.55968 |
| C16orf89  | 8.16x10 <sup>-3</sup> | 4.63x10 <sup>-2</sup> | 0.618068 |
| C17orf47  | 3.73x10 <sup>-3</sup> | 2.74x10 <sup>-2</sup> | 0.451486 |
| C17orf64  | 3.51x10 <sup>-5</sup> | 1.25x10 <sup>-3</sup> | -0.86293 |
| C19orf38  | 5.19x10 <sup>-6</sup> | 3.80x10 <sup>-4</sup> | -0.30184 |
| C19orf45  | 1.98x10 <sup>-3</sup> | 1.80x10 <sup>-2</sup> | -0.40556 |
| C22orf31  | 4.21x10 <sup>-4</sup> | 6.41x10 <sup>-3</sup> | -0.57411 |
| C2orf71   | 1.59x10 <sup>-3</sup> | 1.55x10 <sup>-2</sup> | -0.68213 |
| C3orf36   | 5.43x10 <sup>-3</sup> | 3.52x10 <sup>-2</sup> | 0.276315 |
| C6orf201  | 7.63x10 <sup>-3</sup> | 4.44x10 <sup>-2</sup> | 0.36535  |
| C8G       | 5.33x10 <sup>-3</sup> | 3.48x10 <sup>-2</sup> | -0.32666 |
| C8orf48   | 4.25x10 <sup>-4</sup> | 6.45x10 <sup>-3</sup> | 0.594196 |
| C9orf172  | 2.43x10 <sup>-3</sup> | 2.06x10 <sup>-2</sup> | 0.275374 |

Table III. Continued.

| Gene    | P-value                | FDR                   | logFC    |
|---------|------------------------|-----------------------|----------|
| C9orf24 | 2.64x10 <sup>-3</sup>  | 2.19x10 <sup>-2</sup> | -0.40476 |
| CA8     | 3.82x10 <sup>-4</sup>  | 5.94x10 <sup>-3</sup> | 0.831536 |
| CACNA1H | 3.70x10 <sup>-5</sup>  | 1.29x10 <sup>-3</sup> | 0.271938 |
| CALML6  | 4.80x10 <sup>-3</sup>  | 3.23x10 <sup>-2</sup> | -0.3654  |
| CAMP    | 8.21x10 <sup>-3</sup>  | 4.65x10 <sup>-2</sup> | -0.54201 |
| CASP14  | 1.11x10 <sup>-3</sup>  | 1.24x10 <sup>-2</sup> | 0.625268 |
| CBWD5   | 7.46x10 <sup>-3</sup>  | 4.37x10 <sup>-2</sup> | 0.616089 |
| CCBE1   | 2.12x10 <sup>-3</sup>  | 1.87x10 <sup>-2</sup> | 0.615604 |
| CCDC155 | 8.38x10 <sup>-3</sup>  | 4.71x10 <sup>-2</sup> | -0.57403 |
| CCDC68  | 1.34x10 <sup>-4</sup>  | 2.97x10 <sup>-3</sup> | 0.298382 |
| CCL19   | 2.57x10 <sup>-3</sup>  | 2.14x10 <sup>-2</sup> | -0.35121 |
| CD1C    | 6.99x10 <sup>-3</sup>  | 4.17x10 <sup>-2</sup> | -0.3047  |
| CD1E    | 3.67x10 <sup>-3</sup>  | 2.71x10 <sup>-2</sup> | -0.36719 |
| CDH2    | 3.19x10 <sup>-6</sup>  | 2.78x10 <sup>-4</sup> | 0.467391 |
| CDKL5   | 4.71x10 <sup>-4</sup>  | 6.89x10 <sup>-3</sup> | 0.357388 |
| CDYL2   | 1.92x10 <sup>-5</sup>  | 8.43x10 <sup>-4</sup> | 0.348412 |
| CHIT1   | 6.19x10 <sup>-3</sup>  | 3.86x10 <sup>-2</sup> | -0.37137 |
| CHODL   | 7.89x10 <sup>-6</sup>  | 4.82x10 <sup>-4</sup> | -0.49488 |
| CHSY3   | 4.00x10 <sup>-5</sup>  | 1.34x10 <sup>-3</sup> | 0.318751 |
| CLDN11  | 7.32x10 <sup>-3</sup>  | 4.30x10 <sup>-2</sup> | 0.264272 |
| CLEC10A | 2.66x10 <sup>-3</sup>  | 2.20x10 <sup>-2</sup> | -0.28604 |
| CLECL1  | 2.62x10 <sup>-4</sup>  | 4.68x10 <sup>-3</sup> | -0.40326 |
| CLSTN2  | 2.24x10 <sup>-3</sup>  | 1.95x10 <sup>-2</sup> | 0.337955 |
| CNGB1   | 5.45x10 <sup>-3</sup>  | 3.53x10 <sup>-2</sup> | 0.412079 |
| CNTF    | 2.40x10 <sup>-5</sup>  | 9.75x10 <sup>-4</sup> | 0.314121 |
| CNTFR   | 2.46x10 <sup>-3</sup>  | 2.07x10 <sup>-2</sup> | -0.50467 |
| COL11A1 | 1.48x10 <sup>-4</sup>  | 3.18x10 <sup>-3</sup> | 0.596191 |
| COL13A1 | 2.01x10 <sup>-4</sup>  | 4.01x10 <sup>-3</sup> | 0.307701 |
| COL8A1  | 8.74x10 <sup>-8</sup>  | 3.25x10 <sup>-5</sup> | 0.392924 |
| COLEC11 | 5.79x10 <sup>-5</sup>  | 1.70x10 <sup>-3</sup> | -0.40288 |
| CORO2B  | 2.52x10 <sup>-3</sup>  | 2.11x10 <sup>-2</sup> | 0.306182 |
| COX6A2  | 3.18x10 <sup>-4</sup>  | 5.30x10 <sup>-3</sup> | -0.74025 |
| CREG2   | 4.21x10 <sup>-3</sup>  | 2.96x10 <sup>-2</sup> | 0.482985 |
| CRTAM   | 4.55x10 <sup>-3</sup>  | 3.12x10 <sup>-2</sup> | -0.30083 |
| CRYBB3  | 8.79x10 <sup>-3</sup>  | 4.86x10 <sup>-2</sup> | -0.33766 |
| CSF2    | 4.29x10 <sup>-4</sup>  | 6.49x10 <sup>-3</sup> | 0.524039 |
| CSMD2   | 4.48x10 <sup>-3</sup>  | 3.09x10 <sup>-2</sup> | 0.319247 |
| CXCL13  | 5.34x10 <sup>-3</sup>  | 3.48x10 <sup>-2</sup> | -0.26968 |
| CXCL2   | 2.41x10 <sup>-4</sup>  | 4.45x10 <sup>-3</sup> | 0.298442 |
| CXCL3   | 8.22x10 <sup>-5</sup>  | 2.12x10 <sup>-3</sup> | 0.371064 |
| CXCL5   | 1.49x10 <sup>-11</sup> | 1.10x10 <sup>-7</sup> | 0.899753 |
| CXCL6   | 7.66x10 <sup>-3</sup>  | 4.45x10 <sup>-2</sup> | 0.299883 |
| CXCR1   | 6.86x10 <sup>-3</sup>  | 4.12x10 <sup>-2</sup> | 0.3767   |
| CYP26A1 | 3.42x10 <sup>-11</sup> | 1.68x10 <sup>-7</sup> | -1.20765 |
| CYP26C1 | 2.10x10 <sup>-8</sup>  | 1.56x10 <sup>-5</sup> | -1.33798 |
| CYP27C1 | 8.06x10 <sup>-3</sup>  | 4.60x10 <sup>-2</sup> | 0.277889 |
| CYP4F12 | 6.26x10 <sup>-4</sup>  | 8.41x10 <sup>-3</sup> | -0.36264 |
| CYTL1   | 8.79x10 <sup>-5</sup>  | 2.23x10 <sup>-3</sup> | 0.469865 |
| DAAM2   | 2.54x10 <sup>-6</sup>  | 2.40x10 <sup>-4</sup> | 0.319035 |
| DCLK1   | 1.62x10 <sup>-3</sup>  | 1.57x10 <sup>-2</sup> | 0.36134  |
| DCLK3   | 2.36x10 <sup>-8</sup>  | 1.56x10 <sup>-5</sup> | 0.558236 |
| DDIT4L  | 3.59x10 <sup>-3</sup>  | 2.68x10 <sup>-2</sup> | 0.4411   |
| DDR2    | 1.29x10 <sup>-5</sup>  | 6.71x10 <sup>-4</sup> | 0.389959 |
| DHDH    | 2.03x10 <sup>-5</sup>  | 8.73x10 <sup>-4</sup> | -0.308   |
| DKKL1   | 1.46x10 <sup>-4</sup>  | 3.15x10 <sup>-3</sup> | -0.52903 |
| DLK2    | 1.15x10 <sup>-3</sup>  | 1.27x10 <sup>-2</sup> | -0.30782 |
| DLL3    | 3.68x10 <sup>-3</sup>  | 2.72x10 <sup>-2</sup> | -0.31673 |
| DMBT1   | 1.20x10 <sup>-3</sup>  | 1.31x10 <sup>-2</sup> | 0.600391 |
| DMRT1   | 8.95x10 <sup>-3</sup>  | 4.91x10 <sup>-2</sup> | -0.68811 |

Table III. Continued.

| Gene    | P-value               | FDR                   | logFC    |
|---------|-----------------------|-----------------------|----------|
| DMRT2   | 7.59x10 <sup>-4</sup> | 9.67x10 <sup>-3</sup> | -0.57352 |
| DNAH5   | 9.03x10 <sup>-3</sup> | 4.93x10 <sup>-2</sup> | 0.273049 |
| DNAJC6  | 2.76x10 <sup>-4</sup> | 4.86x10 <sup>-3</sup> | 0.339983 |
| DNER    | 3.12x10 <sup>-3</sup> | 2.45x10 <sup>-2</sup> | 0.481219 |
| DOC2A   | 3.96x10 <sup>-3</sup> | 2.84x10 <sup>-2</sup> | -0.33183 |
| DOK6    | 9.89x10 <sup>-5</sup> | 2.42x10 <sup>-3</sup> | 0.458769 |
| DPP4    | 2.21x10 <sup>-3</sup> | 1.93x10 <sup>-2</sup> | 0.273895 |
| DYDC2   | 3.29x10 <sup>-4</sup> | 5.44x10 <sup>-3</sup> | -0.57942 |
| EDA2R   | 1.28x10 <sup>-6</sup> | 1.54x10 <sup>-4</sup> | 0.558478 |
| EDIL3   | 4.28x10 <sup>-6</sup> | 3.42x10 <sup>-4</sup> | 0.512038 |
| EME2    | 1.10x10 <sup>-6</sup> | 1.42x10 <sup>-4</sup> | 0.332172 |
| EN2     | 4.99x10 <sup>-3</sup> | 3.32x10 <sup>-2</sup> | -0.29492 |
| ENHO    | 1.81x10 <sup>-3</sup> | 1.69x10 <sup>-2</sup> | -0.34906 |
| ENPP1   | 3.05x10 <sup>-3</sup> | 2.41x10 <sup>-2</sup> | 0.265739 |
| EREG    | 3.09x10 <sup>-4</sup> | 5.22x10 <sup>-3</sup> | 0.491796 |
| ERN1    | 1.61x10 <sup>-5</sup> | 7.69x10 <sup>-4</sup> | 0.270479 |
| ESM1    | 7.77x10 <sup>-7</sup> | 1.12x10 <sup>-4</sup> | 0.305381 |
| EXD1    | 2.66x10 <sup>-3</sup> | 2.19x10 <sup>-2</sup> | -0.51645 |
| EYS     | 6.89x10 <sup>-4</sup> | 9.03x10 <sup>-3</sup> | 0.291741 |
| FAM131C | 6.62x10 <sup>-3</sup> | 4.02x10 <sup>-2</sup> | -0.27225 |
| FAM13C  | 1.34x10 <sup>-3</sup> | 1.40x10 <sup>-2</sup> | 0.373734 |
| FAM155A | 4.84x10 <sup>-3</sup> | 3.25x10 <sup>-2</sup> | 0.392073 |
| FAM159A | 5.81x10 <sup>-7</sup> | 1.02x10 <sup>-4</sup> | -0.43932 |
| FAM196B | 2.77x10 <sup>-5</sup> | 1.08x10 <sup>-3</sup> | 0.923863 |
| FAM26E  | 4.26x10 <sup>-5</sup> | 1.39x10 <sup>-3</sup> | 0.304402 |
| FAM57B  | 5.13x10 <sup>-5</sup> | 1.58x10 <sup>-3</sup> | -0.42798 |
| FAM71F2 | 8.66x10 <sup>-3</sup> | 4.81x10 <sup>-2</sup> | 0.293528 |
| FAM90A1 | 3.54x10 <sup>-5</sup> | 1.26x10 <sup>-3</sup> | -0.37489 |
| FAT4    | 2.10x10 <sup>-4</sup> | 4.11x10 <sup>-3</sup> | 0.2779   |
| FBN2    | 1.05x10 <sup>-4</sup> | 2.52x10 <sup>-3</sup> | 0.409823 |
| FCAR    | 7.88x10 <sup>-4</sup> | 9.91x10 <sup>-3</sup> | 0.735931 |
| FCGR3B  | 1.61x10 <sup>-3</sup> | 1.56x10 <sup>-2</sup> | 0.34859  |
| FGA     | 1.45x10 <sup>-3</sup> | 1.46x10 <sup>-2</sup> | 0.896193 |
| FGB     | 5.26x10 <sup>-4</sup> | 7.48x10 <sup>-3</sup> | 1.017918 |
| FGF5    | 4.13x10 <sup>-5</sup> | 1.38x10 <sup>-3</sup> | 1.155971 |
| FGG     | 5.61x10 <sup>-3</sup> | 3.60x10 <sup>-2</sup> | 1.021629 |
| FGL1    | 6.60x10 <sup>-3</sup> | 4.01x10 <sup>-2</sup> | 0.823634 |
| FIBIN   | 3.81x10 <sup>-3</sup> | 2.77x10 <sup>-2</sup> | 0.298552 |
| FIGN    | 4.97x10 <sup>-7</sup> | 9.50x10 <sup>-5</sup> | 0.63472  |
| FKBP6   | 6.84x10 <sup>-6</sup> | 4.51x10 <sup>-4</sup> | -0.63202 |
| FLT3    | 5.49x10 <sup>-3</sup> | 3.54x10 <sup>-2</sup> | -0.3778  |
| FMN1    | 5.48x10 <sup>-3</sup> | 3.53x10 <sup>-2</sup> | 0.26474  |
| FNDC1   | 1.60x10 <sup>-6</sup> | 1.78x10 <sup>-4</sup> | 0.350421 |
| FNDC4   | 4.97x10 <sup>-5</sup> | 1.55x10 <sup>-3</sup> | 0.263423 |
| FOLH1   | 2.53x10 <sup>-4</sup> | 4.56x10 <sup>-3</sup> | 0.341902 |
| FOXA2   | 1.41x10 <sup>-3</sup> | 1.45x10 <sup>-2</sup> | 0.852123 |
| FOXC2   | 4.39x10 <sup>-9</sup> | 8.77x10 <sup>-6</sup> | 0.847615 |
| FOXD3   | 5.13x10 <sup>-4</sup> | 7.36x10 <sup>-3</sup> | -0.38489 |
| FOXE1   | 1.35x10 <sup>-3</sup> | 1.41x10 <sup>-2</sup> | -0.29221 |
| FOXL1   | 3.05x10 <sup>-5</sup> | 1.16x10 <sup>-3</sup> | 0.364032 |
| FRMD5   | 3.33x10 <sup>-4</sup> | 5.47x10 <sup>-3</sup> | 0.400709 |
| FRMPD1  | 4.56x10 <sup>-3</sup> | 3.13x10 <sup>-2</sup> | 0.627559 |
| FXYP1   | 3.00x10 <sup>-3</sup> | 2.39x10 <sup>-2</sup> | -0.43192 |
| FZD9    | 3.19x10 <sup>-3</sup> | 2.48x10 <sup>-2</sup> | -0.28478 |
| GABRP   | 1.50x10 <sup>-3</sup> | 1.49x10 <sup>-2</sup> | -0.33042 |
| GABRR2  | 7.19x10 <sup>-4</sup> | 9.32x10 <sup>-3</sup> | 0.592052 |
| GALNT13 | 1.21x10 <sup>-3</sup> | 1.32x10 <sup>-2</sup> | 0.707226 |
| GARNL3  | 5.09x10 <sup>-6</sup> | 3.76x10 <sup>-4</sup> | -0.26716 |
| GAS2L3  | 6.18x10 <sup>-4</sup> | 8.33x10 <sup>-3</sup> | 0.290159 |

Table SIII. Continued.

| Gene      | P-value               | FDR                   | logFC    |
|-----------|-----------------------|-----------------------|----------|
| GFPT2     | 1.09x10 <sup>-4</sup> | 2.59x10 <sup>-3</sup> | 0.280752 |
| GHRL      | 6.24x10 <sup>-3</sup> | 3.88x10 <sup>-2</sup> | -0.36935 |
| GLIPR1L2  | 6.40x10 <sup>-3</sup> | 3.94x10 <sup>-2</sup> | -0.26736 |
| GNMT      | 7.53x10 <sup>-3</sup> | 4.40x10 <sup>-2</sup> | -0.32181 |
| GPC6      | 3.54x10 <sup>-3</sup> | 2.65x10 <sup>-2</sup> | 0.274592 |
| GPHA2     | 6.44x10 <sup>-5</sup> | 1.82x10 <sup>-3</sup> | -0.65823 |
| GPR157    | 1.94x10 <sup>-4</sup> | 3.91x10 <sup>-3</sup> | 0.276961 |
| GPR173    | 6.32x10 <sup>-3</sup> | 3.91x10 <sup>-2</sup> | 0.378487 |
| GPR62     | 2.90x10 <sup>-6</sup> | 2.62x10 <sup>-4</sup> | -0.46866 |
| GPR75     | 2.00x10 <sup>-4</sup> | 3.99x10 <sup>-3</sup> | 0.279186 |
| GPR78     | 1.31x10 <sup>-3</sup> | 1.38x10 <sup>-2</sup> | 0.695771 |
| GRAMD1B   | 1.73x10 <sup>-3</sup> | 1.63x10 <sup>-2</sup> | 0.365853 |
| GRIA3     | 1.89x10 <sup>-5</sup> | 8.39x10 <sup>-4</sup> | 0.550438 |
| GRIK2     | 6.73x10 <sup>-4</sup> | 8.89x10 <sup>-3</sup> | 0.564626 |
| GRIK3     | 1.95x10 <sup>-5</sup> | 8.51x10 <sup>-4</sup> | 0.56056  |
| GRIN2C    | 1.86x10 <sup>-7</sup> | 4.64x10 <sup>-5</sup> | -0.43512 |
| GUCA1A    | 7.09x10 <sup>-3</sup> | 4.21x10 <sup>-2</sup> | 0.58435  |
| GUCY1A2   | 2.02x10 <sup>-3</sup> | 1.82x10 <sup>-2</sup> | 0.317261 |
| GXYLT2    | 9.02x10 <sup>-3</sup> | 4.93x10 <sup>-2</sup> | 0.266808 |
| HAPLN4    | 7.05x10 <sup>-3</sup> | 4.20x10 <sup>-2</sup> | 0.348151 |
| HEPHL1    | 1.46x10 <sup>-3</sup> | 1.47x10 <sup>-2</sup> | 0.457044 |
| HHIP      | 1.06x10 <sup>-3</sup> | 1.20x10 <sup>-2</sup> | 0.82155  |
| HIST1H1B  | 2.03x10 <sup>-4</sup> | 4.03x10 <sup>-3</sup> | -0.39578 |
| HIST1H1E  | 7.79x10 <sup>-4</sup> | 9.84x10 <sup>-3</sup> | -0.28255 |
| HIST1H2AH | 2.01x10 <sup>-3</sup> | 1.81x10 <sup>-2</sup> | -0.4101  |
| HIST1H2AJ | 1.02x10 <sup>-3</sup> | 1.18x10 <sup>-2</sup> | -0.3895  |
| HIST1H2BM | 1.49x10 <sup>-5</sup> | 7.36x10 <sup>-4</sup> | -0.79809 |
| HIST1H3F  | 8.81x10 <sup>-4</sup> | 1.07x10 <sup>-2</sup> | -0.41456 |
| HLF       | 3.41x10 <sup>-4</sup> | 5.56x10 <sup>-3</sup> | -0.29    |
| HMSD      | 2.10x10 <sup>-3</sup> | 1.87x10 <sup>-2</sup> | -0.33277 |
| HMX2      | 3.32x10 <sup>-3</sup> | 2.56x10 <sup>-2</sup> | -0.4645  |
| HOXA6     | 2.11x10 <sup>-4</sup> | 4.12x10 <sup>-3</sup> | 0.382574 |
| HPCA      | 1.04x10 <sup>-3</sup> | 1.19x10 <sup>-2</sup> | -0.34365 |
| HRASLS    | 2.39x10 <sup>-3</sup> | 2.03x10 <sup>-2</sup> | -0.39391 |
| HRASLS2   | 7.12x10 <sup>-6</sup> | 4.53x10 <sup>-4</sup> | -0.56681 |
| HRH2      | 2.79x10 <sup>-3</sup> | 2.27x10 <sup>-2</sup> | 0.376715 |
| HS3ST3B1  | 8.83x10 <sup>-4</sup> | 1.07x10 <sup>-2</sup> | 0.37522  |
| HS3ST6    | 4.36x10 <sup>-3</sup> | 3.04x10 <sup>-2</sup> | -0.45953 |
| HSD17B2   | 1.22x10 <sup>-5</sup> | 6.48x10 <sup>-4</sup> | 0.492287 |
| HSPB3     | 4.53x10 <sup>-3</sup> | 3.11x10 <sup>-2</sup> | -0.60977 |
| HUS1B     | 6.83x10 <sup>-3</sup> | 4.11x10 <sup>-2</sup> | -0.33146 |
| IBSP      | 3.48x10 <sup>-5</sup> | 1.25x10 <sup>-3</sup> | 0.739162 |
| IGDCC4    | 3.24x10 <sup>-5</sup> | 1.19x10 <sup>-3</sup> | 0.299023 |
| IL12B     | 4.83x10 <sup>-3</sup> | 3.24x10 <sup>-2</sup> | -0.42892 |
| IL13RA2   | 1.28x10 <sup>-3</sup> | 1.36x10 <sup>-2</sup> | 0.531241 |
| IL1A      | 6.52x10 <sup>-3</sup> | 3.98x10 <sup>-2</sup> | 0.30459  |
| IL1B      | 3.93x10 <sup>-5</sup> | 1.34x10 <sup>-3</sup> | 0.275915 |
| IL22RA2   | 3.47x10 <sup>-3</sup> | 2.62x10 <sup>-2</sup> | -0.40812 |
| IL6       | 3.98x10 <sup>-3</sup> | 2.85x10 <sup>-2</sup> | 0.304169 |
| IL6ST     | 1.64x10 <sup>-5</sup> | 7.71x10 <sup>-4</sup> | 0.277959 |
| IMPG1     | 5.57x10 <sup>-4</sup> | 7.77x10 <sup>-3</sup> | 0.488423 |
| INHBA     | 8.47x10 <sup>-5</sup> | 2.16x10 <sup>-3</sup> | 0.352156 |
| ISM2      | 6.74x10 <sup>-3</sup> | 4.07x10 <sup>-2</sup> | -0.41776 |
| ITGAD     | 1.01x10 <sup>-3</sup> | 1.18x10 <sup>-2</sup> | -0.52061 |
| ITGB3     | 3.67x10 <sup>-8</sup> | 1.86x10 <sup>-5</sup> | 0.484377 |
| ITGBL1    | 6.64x10 <sup>-3</sup> | 4.03x10 <sup>-2</sup> | 0.32817  |
| JPH3      | 8.58x10 <sup>-3</sup> | 4.78x10 <sup>-2</sup> | 0.432516 |
| KANK4     | 6.90x10 <sup>-6</sup> | 4.52x10 <sup>-4</sup> | 0.694757 |
| KCNA6     | 2.46x10 <sup>-3</sup> | 2.08x10 <sup>-2</sup> | 0.49403  |

Table SIII. Continued.

| Gene     | P-value               | FDR                   | logFC    |
|----------|-----------------------|-----------------------|----------|
| KCNA7    | 3.20x10 <sup>-3</sup> | 2.49x10 <sup>-2</sup> | -0.4042  |
| KCND2    | 5.45x10 <sup>-5</sup> | 1.63x10 <sup>-3</sup> | 0.41129  |
| KCNE2    | 1.19x10 <sup>-7</sup> | 3.39x10 <sup>-5</sup> | -0.35685 |
| KCNE4    | 4.26x10 <sup>-5</sup> | 1.39x10 <sup>-3</sup> | 0.298036 |
| KCNF1    | 2.47x10 <sup>-3</sup> | 2.08x10 <sup>-2</sup> | 0.649179 |
| KCNG3    | 8.70x10 <sup>-6</sup> | 5.20x10 <sup>-4</sup> | -0.40026 |
| KCNJ12   | 2.70x10 <sup>-3</sup> | 2.21x10 <sup>-2</sup> | 0.319676 |
| KCNK3    | 1.42x10 <sup>-3</sup> | 1.45x10 <sup>-2</sup> | 0.356402 |
| KCNMB4   | 3.90x10 <sup>-3</sup> | 2.81x10 <sup>-2</sup> | 0.27269  |
| KCNN2    | 6.51x10 <sup>-3</sup> | 3.97x10 <sup>-2</sup> | 0.395713 |
| KCNQ3    | 5.46x10 <sup>-4</sup> | 7.65x10 <sup>-3</sup> | 0.571352 |
| KEL      | 1.04x10 <sup>-6</sup> | 1.38x10 <sup>-4</sup> | -0.58961 |
| KIAA0754 | 5.92x10 <sup>-5</sup> | 1.72x10 <sup>-3</sup> | 0.336591 |
| KIAA1257 | 2.47x10 <sup>-4</sup> | 4.50x10 <sup>-3</sup> | -0.39713 |
| KIAA1644 | 8.93x10 <sup>-5</sup> | 2.25x10 <sup>-3</sup> | 0.325497 |
| KIRREL   | 1.43x10 <sup>-6</sup> | 1.62x10 <sup>-4</sup> | 0.381466 |
| KL       | 1.25x10 <sup>-3</sup> | 1.34x10 <sup>-2</sup> | 0.328989 |
| KLK1     | 4.42x10 <sup>-3</sup> | 3.07x10 <sup>-2</sup> | -0.32051 |
| KLRG2    | 7.94x10 <sup>-5</sup> | 2.08x10 <sup>-3</sup> | -0.38122 |
| KRT83    | 6.46x10 <sup>-3</sup> | 3.96x10 <sup>-2</sup> | 0.65278  |
| LAMA1    | 1.06x10 <sup>-4</sup> | 2.55x10 <sup>-3</sup> | 0.479449 |
| LCE1C    | 6.54x10 <sup>-3</sup> | 3.99x10 <sup>-2</sup> | -0.60325 |
| LDHC     | 1.14x10 <sup>-7</sup> | 3.35x10 <sup>-5</sup> | -0.63295 |
| LDLRAD3  | 1.72x10 <sup>-6</sup> | 1.87x10 <sup>-4</sup> | 0.272721 |
| LGALS2   | 1.30x10 <sup>-3</sup> | 1.37x10 <sup>-2</sup> | -0.37218 |
| LGALS9C  | 1.20x10 <sup>-5</sup> | 6.47x10 <sup>-4</sup> | -0.28483 |
| LHX4     | 4.69x10 <sup>-4</sup> | 6.88x10 <sup>-3</sup> | 0.321901 |
| LILRA4   | 3.48x10 <sup>-3</sup> | 2.63x10 <sup>-2</sup> | -0.42849 |
| LIPG     | 3.04x10 <sup>-5</sup> | 1.16x10 <sup>-3</sup> | 0.28777  |
| LRRC15   | 5.70x10 <sup>-4</sup> | 7.89x10 <sup>-3</sup> | 0.360766 |
| LRRC36   | 2.03x10 <sup>-3</sup> | 1.83x10 <sup>-2</sup> | 0.364622 |
| LY9      | 2.24x10 <sup>-3</sup> | 1.95x10 <sup>-2</sup> | -0.28811 |
| LYVE1    | 1.10x10 <sup>-5</sup> | 6.06x10 <sup>-4</sup> | 0.376172 |
| MAGEL2   | 2.11x10 <sup>-3</sup> | 1.87x10 <sup>-2</sup> | 0.459307 |
| MAMDC2   | 2.86x10 <sup>-3</sup> | 2.31x10 <sup>-2</sup> | 0.390334 |
| MAPK4    | 2.50x10 <sup>-3</sup> | 2.10x10 <sup>-2</sup> | 0.685834 |
| MASP2    | 4.72x10 <sup>-3</sup> | 3.19x10 <sup>-2</sup> | 0.263048 |
| MAT1A    | 5.42x10 <sup>-5</sup> | 1.63x10 <sup>-3</sup> | -0.55982 |
| MCHR1    | 2.46x10 <sup>-4</sup> | 4.50x10 <sup>-3</sup> | 0.550639 |
| MEI1     | 2.98x10 <sup>-4</sup> | 5.11x10 <sup>-3</sup> | -0.31329 |
| MGAT5    | 4.02x10 <sup>-5</sup> | 1.34x10 <sup>-3</sup> | 0.271682 |
| MICALCL  | 6.44x10 <sup>-7</sup> | 1.05x10 <sup>-4</sup> | 0.377678 |
| MME      | 2.30x10 <sup>-5</sup> | 9.53x10 <sup>-4</sup> | 0.397555 |
| MMP1     | 3.24x10 <sup>-5</sup> | 1.19x10 <sup>-3</sup> | 0.334293 |
| MMP16    | 1.27x10 <sup>-6</sup> | 1.54x10 <sup>-4</sup> | 0.595007 |
| MMP3     | 3.41x10 <sup>-3</sup> | 2.59x10 <sup>-2</sup> | 0.302642 |
| MMP8     | 2.12x10 <sup>-4</sup> | 4.12x10 <sup>-3</sup> | 0.865484 |
| MORN3    | 3.76x10 <sup>-3</sup> | 2.75x10 <sup>-2</sup> | -0.29297 |
| MSMP     | 7.82x10 <sup>-8</sup> | 3.20x10 <sup>-5</sup> | 0.268341 |
| MSX2     | 7.56x10 <sup>-4</sup> | 9.67x10 <sup>-3</sup> | 0.345084 |
| MUC6     | 3.07x10 <sup>-3</sup> | 2.42x10 <sup>-2</sup> | 0.618538 |
| MYBPC2   | 8.05x10 <sup>-3</sup> | 4.59x10 <sup>-2</sup> | -0.6004  |
| MYLPF    | 3.30x10 <sup>-3</sup> | 2.55x10 <sup>-2</sup> | -0.49248 |
| MYOCD    | 1.02x10 <sup>-3</sup> | 1.18x10 <sup>-2</sup> | 0.58648  |
| MYOM3    | 4.76x10 <sup>-3</sup> | 3.21x10 <sup>-2</sup> | 0.309465 |
| MYOZ3    | 1.88x10 <sup>-4</sup> | 3.82x10 <sup>-3</sup> | 0.426603 |
| MYPN     | 7.30x10 <sup>-3</sup> | 4.30x10 <sup>-2</sup> | 0.749901 |
| NALCN    | 3.34x10 <sup>-3</sup> | 2.56x10 <sup>-2</sup> | 0.663515 |
| NEGR1    | 2.87x10 <sup>-3</sup> | 2.31x10 <sup>-2</sup> | 0.29581  |

Table III. Continued.

| Gene    | P-value                | FDR                   | logFC    |
|---------|------------------------|-----------------------|----------|
| NFATC2  | 3.11x10 <sup>-3</sup>  | 2.44x10 <sup>-2</sup> | 0.330488 |
| NFE2    | 2.42x10 <sup>-3</sup>  | 2.05x10 <sup>-2</sup> | 0.340092 |
| NHSL2   | 4.72x10 <sup>-3</sup>  | 3.19x10 <sup>-2</sup> | 0.335192 |
| NID2    | 4.90x10 <sup>-10</sup> | 1.80x10 <sup>-6</sup> | 0.30808  |
| NIPAL1  | 1.49x10 <sup>-3</sup>  | 1.49x10 <sup>-2</sup> | 0.277031 |
| NKD1    | 1.09x10 <sup>-3</sup>  | 1.22x10 <sup>-2</sup> | 0.322054 |
| NKX2-3  | 5.36x10 <sup>-3</sup>  | 3.49x10 <sup>-2</sup> | -0.62983 |
| NLRP12  | 3.10x10 <sup>-3</sup>  | 2.44x10 <sup>-2</sup> | 0.480027 |
| NOG     | 5.46x10 <sup>-4</sup>  | 7.65x10 <sup>-3</sup> | 0.61628  |
| NOS2    | 9.22x10 <sup>-3</sup>  | 4.99x10 <sup>-2</sup> | -0.43888 |
| NPAS1   | 7.57x10 <sup>-4</sup>  | 9.67x10 <sup>-3</sup> | -0.26943 |
| NPR2    | 1.68x10 <sup>-5</sup>  | 7.82x10 <sup>-4</sup> | 0.285221 |
| NPTX1   | 9.84x10 <sup>-4</sup>  | 1.15x10 <sup>-2</sup> | 0.504191 |
| NTN5    | 5.73x10 <sup>-3</sup>  | 3.65x10 <sup>-2</sup> | -0.27827 |
| OCLM    | 5.97x10 <sup>-7</sup>  | 1.02x10 <sup>-4</sup> | 0.572439 |
| OLFM1   | 1.55x10 <sup>-3</sup>  | 1.53x10 <sup>-2</sup> | -0.28839 |
| OLFM4   | 2.35x10 <sup>-3</sup>  | 2.01x10 <sup>-2</sup> | 0.49839  |
| OPN1SW  | 1.86x10 <sup>-3</sup>  | 1.72x10 <sup>-2</sup> | 0.491306 |
| OR51E1  | 9.40x10 <sup>-8</sup>  | 3.25x10 <sup>-5</sup> | 0.515679 |
| OTOP2   | 2.69x10 <sup>-3</sup>  | 2.21x10 <sup>-2</sup> | -0.69866 |
| P4HA3   | 3.69x10 <sup>-5</sup>  | 1.29x10 <sup>-3</sup> | 0.299473 |
| PAEP    | 3.69x10 <sup>-4</sup>  | 5.81x10 <sup>-3</sup> | 1.065211 |
| PAPPA   | 6.96x10 <sup>-5</sup>  | 1.93x10 <sup>-3</sup> | 0.350069 |
| PCP2    | 4.18x10 <sup>-7</sup>  | 8.09x10 <sup>-5</sup> | -0.39673 |
| PCSK1   | 2.35x10 <sup>-3</sup>  | 2.01x10 <sup>-2</sup> | 0.349318 |
| PDE3A   | 5.04x10 <sup>-6</sup>  | 3.76x10 <sup>-4</sup> | 0.679226 |
| PDE6B   | 2.98x10 <sup>-3</sup>  | 2.38x10 <sup>-2</sup> | -0.26345 |
| PDE6G   | 8.67x10 <sup>-3</sup>  | 4.81x10 <sup>-2</sup> | -0.26521 |
| PEAR1   | 4.77x10 <sup>-9</sup>  | 8.77x10 <sup>-6</sup> | 0.321278 |
| PKD1L1  | 3.41x10 <sup>-4</sup>  | 5.56x10 <sup>-3</sup> | 0.429485 |
| PLA2G2D | 5.07x10 <sup>-4</sup>  | 7.30x10 <sup>-3</sup> | -0.46297 |
| PLAC8   | 2.31x10 <sup>-6</sup>  | 2.28x10 <sup>-4</sup> | -0.3393  |
| PNMA2   | 5.21x10 <sup>-3</sup>  | 3.42x10 <sup>-2</sup> | 0.406023 |
| PNPLA3  | 6.77x10 <sup>-3</sup>  | 4.08x10 <sup>-2</sup> | 0.289065 |
| POSTN   | 1.08x10 <sup>-7</sup>  | 3.35x10 <sup>-5</sup> | 0.325058 |
| PPBP    | 3.36x10 <sup>-3</sup>  | 2.57x10 <sup>-2</sup> | 0.660123 |
| PPM1N   | 5.96x10 <sup>-7</sup>  | 1.02x10 <sup>-4</sup> | -0.33538 |
| PPP1R3C | 1.57x10 <sup>-3</sup>  | 1.54x10 <sup>-2</sup> | 0.333219 |
| PRKG1   | 5.26x10 <sup>-6</sup>  | 3.83x10 <sup>-4</sup> | 0.588843 |
| PROK2   | 4.20x10 <sup>-5</sup>  | 1.39x10 <sup>-3</sup> | 0.734228 |
| PRR16   | 1.42x10 <sup>-4</sup>  | 3.11x10 <sup>-3</sup> | 0.324525 |
| PRSS12  | 1.46x10 <sup>-4</sup>  | 3.15x10 <sup>-3</sup> | -0.27389 |
| PRTG    | 5.89x10 <sup>-3</sup>  | 3.72x10 <sup>-2</sup> | 0.425418 |
| PRUNE2  | 4.41x10 <sup>-4</sup>  | 6.62x10 <sup>-3</sup> | 0.280826 |
| PTGFR   | 7.69x10 <sup>-6</sup>  | 4.75x10 <sup>-4</sup> | 0.575916 |
| PTPRD   | 1.32x10 <sup>-3</sup>  | 1.38x10 <sup>-2</sup> | 0.462375 |
| PTPRN   | 5.85x10 <sup>-4</sup>  | 8.03x10 <sup>-3</sup> | 0.620562 |
| PTTG2   | 5.35x10 <sup>-4</sup>  | 7.56x10 <sup>-3</sup> | -0.49849 |
| PTX3    | 1.61x10 <sup>-4</sup>  | 3.39x10 <sup>-3</sup> | 0.524183 |
| PYHIN1  | 5.04x10 <sup>-3</sup>  | 3.35x10 <sup>-2</sup> | -0.27622 |
| RASGRF2 | 1.31x10 <sup>-4</sup>  | 2.94x10 <sup>-3</sup> | 0.264157 |
| RBP7    | 1.25x10 <sup>-4</sup>  | 2.84x10 <sup>-3</sup> | -0.31442 |
| RFX8    | 1.60x10 <sup>-3</sup>  | 1.55x10 <sup>-2</sup> | 0.47868  |
| RHOXF1  | 8.13x10 <sup>-3</sup>  | 4.62x10 <sup>-2</sup> | -0.51875 |
| RNF180  | 3.03x10 <sup>-3</sup>  | 2.40x10 <sup>-2</sup> | 0.328359 |
| RNF212  | 1.55x10 <sup>-3</sup>  | 1.53x10 <sup>-2</sup> | -0.30599 |
| ROR1    | 1.11x10 <sup>-4</sup>  | 2.63x10 <sup>-3</sup> | 0.457923 |
| RPS28   | 7.33x10 <sup>-3</sup>  | 4.31x10 <sup>-2</sup> | -0.28479 |
| RUFY4   | 2.75x10 <sup>-4</sup>  | 4.85x10 <sup>-3</sup> | -0.37789 |



Table III. Continued.

| Gene       | P-value               | FDR                   | logFC    |
|------------|-----------------------|-----------------------|----------|
| RUNX1T1    | 6.04x10 <sup>-5</sup> | 1.74x10 <sup>-3</sup> | 0.601233 |
| SALL1      | 5.57x10 <sup>-3</sup> | 3.58x10 <sup>-2</sup> | 0.297011 |
| SAMD14     | 9.45x10 <sup>-6</sup> | 5.47x10 <sup>-4</sup> | 0.328415 |
| SCG2       | 1.67x10 <sup>-4</sup> | 3.48x10 <sup>-3</sup> | 0.436328 |
| SCG5       | 6.89x10 <sup>-4</sup> | 9.03x10 <sup>-3</sup> | 0.274834 |
| SEMA3A     | 6.21x10 <sup>-3</sup> | 3.86x10 <sup>-2</sup> | 0.294904 |
| SEMA5B     | 7.77x10 <sup>-3</sup> | 4.50x10 <sup>-2</sup> | 0.278921 |
| SERPINA3   | 9.52x10 <sup>-7</sup> | 1.31x10 <sup>-4</sup> | 0.395924 |
| SERPINA5   | 3.77x10 <sup>-3</sup> | 2.75x10 <sup>-2</sup> | 0.471185 |
| SERPIND1   | 1.11x10 <sup>-4</sup> | 2.63x10 <sup>-3</sup> | 0.908432 |
| SH2D4B     | 2.39x10 <sup>-3</sup> | 2.03x10 <sup>-2</sup> | -0.48448 |
| SHANK2     | 2.49x10 <sup>-8</sup> | 1.56x10 <sup>-5</sup> | 0.506897 |
| SIRPG      | 1.62x10 <sup>-3</sup> | 1.56x10 <sup>-2</sup> | -0.26389 |
| SLC16A11   | 1.89x10 <sup>-5</sup> | 8.39x10 <sup>-4</sup> | -0.39408 |
| SLC16A4    | 5.02x10 <sup>-6</sup> | 3.76x10 <sup>-4</sup> | 0.412786 |
| SLC16A8    | 7.41x10 <sup>-8</sup> | 3.11x10 <sup>-5</sup> | -0.38125 |
| SLC19A3    | 1.64x10 <sup>-3</sup> | 1.57x10 <sup>-2</sup> | 0.551228 |
| SLC1A7     | 8.65x10 <sup>-3</sup> | 4.81x10 <sup>-2</sup> | 0.455789 |
| SLC22A3    | 7.25x10 <sup>-4</sup> | 9.38x10 <sup>-3</sup> | 0.292808 |
| SLC25A41   | 2.67x10 <sup>-5</sup> | 1.06x10 <sup>-3</sup> | -0.51875 |
| SLC2A14    | 1.50x10 <sup>-3</sup> | 1.49x10 <sup>-2</sup> | 0.325002 |
| SLC2A4     | 3.63x10 <sup>-4</sup> | 5.77x10 <sup>-3</sup> | -0.31513 |
| SLC30A10   | 1.70x10 <sup>-4</sup> | 3.53x10 <sup>-3</sup> | 0.786699 |
| SLC38A4    | 1.09x10 <sup>-3</sup> | 1.23x10 <sup>-2</sup> | 0.476517 |
| SLC47A2    | 1.92x10 <sup>-3</sup> | 1.76x10 <sup>-2</sup> | -0.37736 |
| SLC4A4     | 1.15x10 <sup>-3</sup> | 1.27x10 <sup>-2</sup> | 0.480145 |
| SLC6A1     | 3.98x10 <sup>-7</sup> | 8.05x10 <sup>-5</sup> | 0.510979 |
| SLC6A14    | 1.08x10 <sup>-3</sup> | 1.22x10 <sup>-2</sup> | 0.298152 |
| SLC6A16    | 3.94x10 <sup>-3</sup> | 2.84x10 <sup>-2</sup> | -0.26325 |
| SLC8A3     | 1.69x10 <sup>-5</sup> | 7.82x10 <sup>-4</sup> | 0.811118 |
| SLN        | 4.50x10 <sup>-3</sup> | 3.10x10 <sup>-2</sup> | 0.623811 |
| SMAD9      | 1.61x10 <sup>-3</sup> | 1.56x10 <sup>-2</sup> | 0.424228 |
| SMC1B      | 6.96x10 <sup>-7</sup> | 1.09x10 <sup>-4</sup> | -0.38676 |
| SMOC1      | 7.23x10 <sup>-5</sup> | 1.97x10 <sup>-3</sup> | 0.492296 |
| SNPH       | 2.95x10 <sup>-6</sup> | 2.65x10 <sup>-4</sup> | 0.310518 |
| SORCS2     | 2.04x10 <sup>-3</sup> | 1.83x10 <sup>-2</sup> | 0.310609 |
| SOX11      | 8.89x10 <sup>-3</sup> | 4.90x10 <sup>-2</sup> | 0.497378 |
| SOX2       | 8.89x10 <sup>-4</sup> | 1.07x10 <sup>-2</sup> | -0.30968 |
| SOX30      | 2.55x10 <sup>-3</sup> | 2.13x10 <sup>-2</sup> | -0.31227 |
| SP9        | 4.23x10 <sup>-4</sup> | 6.42x10 <sup>-3</sup> | -0.58928 |
| SPDEF      | 5.31x10 <sup>-3</sup> | 3.47x10 <sup>-2</sup> | 0.368018 |
| SPIB       | 7.52x10 <sup>-3</sup> | 4.40x10 <sup>-2</sup> | -0.29973 |
| SPON1      | 1.57x10 <sup>-3</sup> | 1.54x10 <sup>-2</sup> | 0.263391 |
| ST6GALNAC5 | 4.07x10 <sup>-3</sup> | 2.89x10 <sup>-2</sup> | 0.280152 |
| ST8SIA2    | 3.57x10 <sup>-3</sup> | 2.66x10 <sup>-2</sup> | 0.558115 |
| STAG3      | 1.06x10 <sup>-4</sup> | 2.55x10 <sup>-3</sup> | -0.36985 |
| STAR       | 2.68x10 <sup>-4</sup> | 4.76x10 <sup>-3</sup> | -0.38622 |
| STC1       | 1.12x10 <sup>-5</sup> | 6.13x10 <sup>-4</sup> | 0.267158 |
| STK32B     | 3.00x10 <sup>-4</sup> | 5.13x10 <sup>-3</sup> | 0.39037  |
| SULT1C4    | 4.68x10 <sup>-5</sup> | 1.47x10 <sup>-3</sup> | 0.582763 |
| SUSD5      | 1.90x10 <sup>-3</sup> | 1.75x10 <sup>-2</sup> | 0.33824  |
| SYCE2      | 1.53x10 <sup>-8</sup> | 1.56x10 <sup>-5</sup> | -0.36659 |
| SYCP2      | 3.46x10 <sup>-5</sup> | 1.25x10 <sup>-3</sup> | -0.28225 |
| SYN3       | 8.93x10 <sup>-3</sup> | 4.91x10 <sup>-2</sup> | 0.623583 |
| SYNGR3     | 1.78x10 <sup>-6</sup> | 1.91x10 <sup>-4</sup> | -0.277   |
| SYT12      | 3.38x10 <sup>-3</sup> | 2.57x10 <sup>-2</sup> | 0.276088 |
| SYT13      | 3.07x10 <sup>-3</sup> | 2.42x10 <sup>-2</sup> | 0.678671 |
| TACR2      | 2.14x10 <sup>-8</sup> | 1.56x10 <sup>-5</sup> | -0.37684 |
| TAF7L      | 2.08x10 <sup>-4</sup> | 4.11x10 <sup>-3</sup> | -0.51576 |

Table SIII. Continued.

| Gene      | P-value               | FDR                   | logFC    |
|-----------|-----------------------|-----------------------|----------|
| TAS2R5    | 2.31x10 <sup>-4</sup> | 4.33x10 <sup>-3</sup> | 0.399152 |
| TCP11     | 7.78x10 <sup>-6</sup> | 4.79x10 <sup>-4</sup> | -0.5369  |
| TDO2      | 1.08x10 <sup>-3</sup> | 1.22x10 <sup>-2</sup> | 0.3282   |
| TEX19     | 3.91x10 <sup>-3</sup> | 2.82x10 <sup>-2</sup> | -0.40785 |
| TFF1      | 4.59x10 <sup>-5</sup> | 1.46x10 <sup>-3</sup> | 0.936607 |
| TFPI      | 7.16x10 <sup>-7</sup> | 1.09x10 <sup>-4</sup> | 0.29467  |
| TFR2      | 1.41x10 <sup>-5</sup> | 7.13x10 <sup>-4</sup> | -0.26649 |
| TLL1      | 1.44x10 <sup>-4</sup> | 3.12x10 <sup>-3</sup> | 0.444447 |
| TM4SF18   | 1.20x10 <sup>-6</sup> | 1.51x10 <sup>-4</sup> | 0.335662 |
| TM6SF2    | 2.03x10 <sup>-3</sup> | 1.83x10 <sup>-2</sup> | 0.446403 |
| TMEM233   | 1.22x10 <sup>-7</sup> | 3.39x10 <sup>-5</sup> | 1.013909 |
| TMEM63C   | 2.09x10 <sup>-3</sup> | 1.86x10 <sup>-2</sup> | -0.28785 |
| TNFAIP6   | 5.17x10 <sup>-5</sup> | 1.59x10 <sup>-3</sup> | 0.316027 |
| TNFRSF11B | 7.54x10 <sup>-4</sup> | 9.66x10 <sup>-3</sup> | 0.369193 |
| TNFRSF13B | 7.65x10 <sup>-3</sup> | 4.44x10 <sup>-2</sup> | -0.40774 |
| TNFRSF13C | 1.27x10 <sup>-5</sup> | 6.63x10 <sup>-4</sup> | -0.32845 |
| TNFSF11   | 3.47x10 <sup>-4</sup> | 5.61x10 <sup>-3</sup> | 0.407792 |
| TNFSF15   | 4.48x10 <sup>-3</sup> | 3.09x10 <sup>-2</sup> | 0.285272 |
| TNNI3     | 2.53x10 <sup>-8</sup> | 1.56x10 <sup>-5</sup> | -0.71293 |
| TRAT1     | 3.52x10 <sup>-3</sup> | 2.64x10 <sup>-2</sup> | -0.31943 |
| TREM1     | 1.13x10 <sup>-3</sup> | 1.26x10 <sup>-2</sup> | 0.295335 |
| TRIM50    | 1.17x10 <sup>-3</sup> | 1.28x10 <sup>-2</sup> | -0.57963 |
| TRIM74    | 3.51x10 <sup>-5</sup> | 1.25x10 <sup>-3</sup> | -0.48543 |
| TRPA1     | 1.20x10 <sup>-3</sup> | 1.31x10 <sup>-2</sup> | 0.522998 |
| TRPC4     | 3.27x10 <sup>-3</sup> | 2.53x10 <sup>-2</sup> | 0.329031 |
| TSPAN11   | 5.04x10 <sup>-6</sup> | 3.76x10 <sup>-4</sup> | 0.298508 |
| TSPAN8    | 3.15x10 <sup>-3</sup> | 2.46x10 <sup>-2</sup> | 0.590333 |
| TSSK1B    | 2.50x10 <sup>-3</sup> | 2.09x10 <sup>-2</sup> | 0.44891  |
| TSSK4     | 3.51x10 <sup>-4</sup> | 5.66x10 <sup>-3</sup> | 0.299403 |
| TTC9B     | 1.57x10 <sup>-5</sup> | 7.62x10 <sup>-4</sup> | -0.80051 |
| TUBAL3    | 8.76x10 <sup>-3</sup> | 4.85x10 <sup>-2</sup> | -0.32468 |
| TULP1     | 8.93x10 <sup>-5</sup> | 2.25x10 <sup>-3</sup> | -0.37709 |
| TYRP1     | 4.21x10 <sup>-4</sup> | 6.41x10 <sup>-3</sup> | 0.964526 |
| UBL4B     | 8.58x10 <sup>-3</sup> | 4.78x10 <sup>-2</sup> | -0.53133 |
| UGT2A1    | 8.62x10 <sup>-3</sup> | 4.80x10 <sup>-2</sup> | -1.09419 |
| UNC5C     | 2.44x10 <sup>-4</sup> | 4.47x10 <sup>-3</sup> | 0.668504 |
| UPB1      | 3.77x10 <sup>-3</sup> | 2.75x10 <sup>-2</sup> | -0.43093 |
| USH1G     | 7.55x10 <sup>-3</sup> | 4.41x10 <sup>-2</sup> | -0.29882 |
| VAT1L     | 1.21x10 <sup>-7</sup> | 3.39x10 <sup>-5</sup> | 0.838979 |
| VGLL3     | 4.40x10 <sup>-5</sup> | 1.42x10 <sup>-3</sup> | 0.337223 |
| VPREB3    | 3.31x10 <sup>-4</sup> | 5.46x10 <sup>-3</sup> | -0.40596 |
| VSTM2L    | 4.47x10 <sup>-3</sup> | 3.09x10 <sup>-2</sup> | 0.345322 |
| WBP2NL    | 2.26x10 <sup>-3</sup> | 1.96x10 <sup>-2</sup> | -0.42805 |
| WBSCR28   | 5.55x10 <sup>-5</sup> | 1.65x10 <sup>-3</sup> | -0.57637 |
| WDR86     | 8.53x10 <sup>-4</sup> | 1.04x10 <sup>-2</sup> | 0.316859 |
| WNT3A     | 1.31x10 <sup>-5</sup> | 6.76x10 <sup>-4</sup> | -0.43745 |
| XKR5      | 2.06x10 <sup>-3</sup> | 1.84x10 <sup>-2</sup> | -0.42603 |
| XKR9      | 7.31x10 <sup>-3</sup> | 4.30x10 <sup>-2</sup> | -0.26701 |
| YBX2      | 3.96x10 <sup>-6</sup> | 3.27x10 <sup>-4</sup> | -0.30651 |
| ZDHHC20   | 8.73x10 <sup>-6</sup> | 5.20x10 <sup>-4</sup> | 0.275449 |
| ZFR2      | 6.49x10 <sup>-7</sup> | 1.05x10 <sup>-4</sup> | -0.58086 |
| ZNF134    | 1.29x10 <sup>-4</sup> | 2.91x10 <sup>-3</sup> | 0.30647  |
| ZNF135    | 3.84x10 <sup>-3</sup> | 2.79x10 <sup>-2</sup> | 0.304737 |
| ZNF229    | 1.49x10 <sup>-3</sup> | 1.49x10 <sup>-2</sup> | 0.463105 |
| ZNF281    | 3.60x10 <sup>-8</sup> | 1.86x10 <sup>-5</sup> | 0.268349 |
| ZNF284    | 3.73x10 <sup>-4</sup> | 5.87x10 <sup>-3</sup> | 0.26402  |
| ZNF304    | 1.90x10 <sup>-4</sup> | 3.84x10 <sup>-3</sup> | 0.27092  |
| ZNF334    | 1.85x10 <sup>-3</sup> | 1.72x10 <sup>-2</sup> | 0.366672 |
| ZNF354C   | 6.51x10 <sup>-3</sup> | 3.97x10 <sup>-2</sup> | 0.284631 |

Table SIII. Continued.

| Gene    | P-value               | FDR                   | logFC    |
|---------|-----------------------|-----------------------|----------|
| ZNF423  | 1.32x10 <sup>-4</sup> | 2.95x10 <sup>-3</sup> | 0.321295 |
| ZNF486  | 6.20x10 <sup>-3</sup> | 3.86x10 <sup>-2</sup> | 0.432278 |
| ZNF491  | 3.73x10 <sup>-4</sup> | 5.86x10 <sup>-3</sup> | 0.377601 |
| ZNF541  | 7.10x10 <sup>-7</sup> | 1.09x10 <sup>-4</sup> | -0.47757 |
| ZNF625  | 4.06x10 <sup>-3</sup> | 2.89x10 <sup>-2</sup> | 0.436012 |
| ZNF660  | 2.09x10 <sup>-4</sup> | 4.11x10 <sup>-3</sup> | 0.571622 |
| ZNF677  | 1.53x10 <sup>-3</sup> | 1.51x10 <sup>-2</sup> | 0.44028  |
| ZNF717  | 2.74x10 <sup>-3</sup> | 2.23x10 <sup>-2</sup> | 0.302428 |
| ZNF772  | 9.01x10 <sup>-4</sup> | 1.08x10 <sup>-2</sup> | 0.335866 |
| ZNF788  | 2.38x10 <sup>-3</sup> | 2.02x10 <sup>-2</sup> | 0.290738 |
| ZNF813  | 2.90x10 <sup>-5</sup> | 1.12x10 <sup>-3</sup> | 0.409548 |
| ZNF829  | 2.44x10 <sup>-3</sup> | 2.07x10 <sup>-2</sup> | 0.478054 |
| ZNF85   | 4.09x10 <sup>-3</sup> | 2.90x10 <sup>-2</sup> | 0.275019 |
| ZNF860  | 2.10x10 <sup>-6</sup> | 2.16x10 <sup>-4</sup> | 0.273614 |
| ZNF93   | 4.63x10 <sup>-3</sup> | 3.16x10 <sup>-2</sup> | 0.321722 |
| ZPLD1   | 1.60x10 <sup>-3</sup> | 1.55x10 <sup>-2</sup> | 0.763274 |
| ZSCAN23 | 4.80x10 <sup>-3</sup> | 3.22x10 <sup>-2</sup> | 0.601591 |
| ZYG11A  | 9.16x10 <sup>-5</sup> | 2.29x10 <sup>-3</sup> | -0.28067 |

FDR, false discovery rate; FC, fold change.
